# Supplementary material
Source: publisher figshare collection journal article supplement (https://acs.figshare.com/ndownloader/files/9968602)
Supplement: Supplementary file 1 [file 9968602]

---

## Supporting Information

### Adapting Assessment Tasks to Support Three-Dimensional Learning

Sonia M. Underwood<sup>1\*</sup>, Lynmarie A. Posey<sup>2</sup>, Deborah G. Herrington<sup>3</sup>, Justin H. Carmel<sup>1</sup>, and Melanie M. Cooper<sup>2</sup>

5   <sup>1</sup>Department of Chemistry & Biochemistry, and STEM Transformation Institute, Florida International University, 11200 SW Eighth Street, Miami, Florida 33199, United States.

<sup>2</sup>Department of Chemistry, Michigan State University, 578 South Shaw Lane, East Lansing, Michigan 48824, United States.

<sup>3</sup>Department of Chemistry, Grand Valley State University, 1 Campus Drive, 312 Padnos Hall  
10   Allendale, Michigan 49401, United States.

#### ASSOCIATED CONTENT

Here we provide additional examples of assessment items modified to better align with 3D learning.

#### EXAMPLE S1: USING MATHEMATICS AND COMPUTATIONAL THINKING

     The original zero-dimensional question presented in Figure 3 of the paper “Calculate the percent  
15   ionization of a 0.030 M solution of fluoroacetic acid ( $\text{CH}_2\text{FCOOH}$ ), which has a pH of 2.12.” can also be transformed to a cluster of selected-response (SR) items that address the scientific practice of *Using Mathematics and Computational Thinking* as shown in Figure S1. It is important to note that this revised question still does not align with a core idea or crosscutting concept.

**Revised Question – Selected Response:**

- What is the percent ionization of a 0.030 M solution of fluoroacetic acid ( $\text{CH}_2\text{FCOOH}$ ) if its pH is 2.12. Fluoroacetic acid has a  $\text{pK}_a$  of 2.59.  
A. 2.5%    B. 4.0%    C. 25%\*    D. 40%
- Which of the following particulate (molecular level) representation best matches your response from question 1?

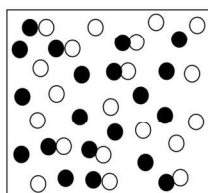

A.

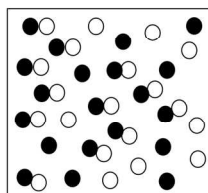

B.

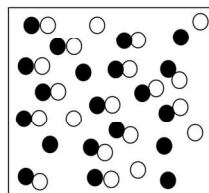

C.\*

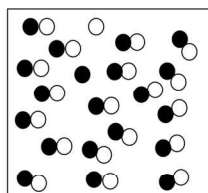

D.

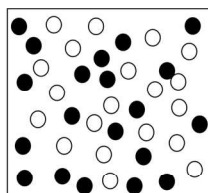

E.

20 Figure S1. Transformation of a percent ionization calculation item to a selected-response 3D question cluster that addresses the scientific practice of *Using Mathematics and Computational Thinking*. This cluster of items does not contain a core idea or crosscutting concept.

**Table S1. Revised SR cluster questions for percent ionization calculation item**

| Question | Core Idea | Science Practice                             | Crosscutting Concept |
|----------|-----------|----------------------------------------------|----------------------|
| Revised  | None      | Using Mathematics and Computational Thinking | None                 |

**EXAMPLE S2: ANALYZING AND INTERPRETING DATA**

25 As students learn about atomic structure in general chemistry, a common learning goal is “knowing” the periodic trends in the properties of atoms, such as ionization energies, across rows and down columns as illustrated by the original question shown in Figure S2. This question is zero-dimensional and elicits no evidence that students understand the factors that lead to these trends in ionization energies. The revised constructed-response (CR) question in Figure S2 introduces the

30 scientific practice of *Analyzing and Interpreting Data*, the core ideas of *Electrostatic and Bonding*

Interactions as well as energy: quantum mechanical energy levels and changes, and crosscutting concept *patterns*.

**Original Question:**

Which of the following has the largest ionization energy?

- A. oxygen\* B. lithium C. sulfur D. carbon

**Limitations of the Question**

- 1) It does not relate directly to the core idea of Electrostatic and Bonding Interactions.
- 2) It does not address a Scientific Practice.
- 3) It asks the students to recall a trend that can be memorized, with no understanding as to why.

**Revised Question – Constructed Response:**

1. The first seven ionization energies of a third-row element are shown in the graph to the right. Identify the element which this set of data would most likely represent.
2. What information from the graph did you use to identify the element?
3. Use your response to question #2 and your understanding of forces and energy changes to explain how you identified the element based on the data provided in question #1. Your response should describe what the ionization energy is.

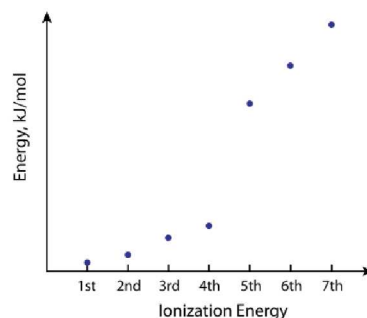

Figure S2. Adaptation of an ionization energy assessment item to a constructed-response task that addresses the core ideas of *Electrostatic and Bonding Interactions* and *Energy: Quantum Mechanical Energy Levels and Changes*, scientific practice of *Analyzing and Interpreting Data*, and crosscutting concept of *Patterns*.

**Table S2. Transformation of a SR question into a CR cluster of questions for ionization energy**

| Question | Core Idea                                                                                    | Science Practice                | Crosscutting Concept |
|----------|----------------------------------------------------------------------------------------------|---------------------------------|----------------------|
| Original | None                                                                                         | None                            | None                 |
| Revised  | Electrostatic Interactions and Bonding; Energy: Quantum Mechanical Energy Levels and Changes | Analyzing and interpreting data | Patterns             |

---

### EXAMPLE S3: CONSTRUCTING EXPLANATIONS AND ENGAGING IN ARGUMENT FROM EVIDENCE

40 Figure S3 shows how a boiling-point ranking task can be transformed to constructed-response and selected-response tasks that have the potential to engage students in the practice of *constructing explanations and engaging in argument from evidence*.

**Original Question:**

Which of these substances has the highest boiling point?

- A.  $\text{H}_2$       B.  $\text{CH}_3\text{OCH}_3$       C.  $\text{HOOH}$       D.  $\text{CO}_2$

**Limitations of the Question**

- 1) It does not address a Scientific Practice.
- 2) It allows students to use a heuristic to predict the answer without understanding why.

**Revised Question – Constructed Response:**

Use the structures provided below to answer the following questions:

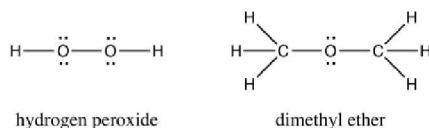

1. In liquid hydrogen peroxide, what intermolecular forces would be present?
2. In liquid dimethyl ether, what intermolecular forces would be present?
3. Draw three molecules of hydrogen peroxide and then dimethyl ether showing the **strongest** intermolecular force for each compound labeling the location and type of IMF you are drawing.
4. Using the relative strengths of intermolecular forces and your understanding of energy changes, which compound would have the higher boiling point? Explain your reasoning.

**Revised Question – Selected Response:**

One of these two compounds is a **liquid** at room temperature. **Choose the compound**, the **evidence** you are using to make the claim, and the **reasoning** that allows you to make this claim.

**Compound:**

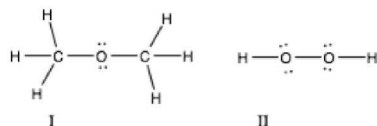

**Evidence:**

- III. Compound I is heavier than compound II.
- IV. Compound I has more hydrogens and can form more hydrogen bonds than II.
- V. Compound II has both hydrogens and oxygens capable of hydrogen bonding.

**Reasoning:**

- VI. Heavier molecules are more likely to cluster together and form liquids because they are attracted to each other strongly by London dispersion forces.
- VII. Molecules capable of hydrogen bonding are strongly attracted to each other and tend to cluster together to form liquids.

- A. I, III, VI      B. I, IV, VII      C. II, V, VII\*      D. Not enough information

Figure S3. Adaptation of a boiling point ranking task to address the core idea *Atomic/Molecular Structure and Properties*, scientific practice *Constructing Explanations and Engaging in Argument from Evidence*, and crosscutting concepts *Structure and Function* and *Cause and Effect: Mechanism and Explanation*. [Previously published in Lavery, J. T.; Underwood, S. M.; Matz, R. L.; Posey, L. A.; Carmel, J. H.; Caballero, M. D.; Fata-Hartley, C. L.; Ebert-May, D.; Jardeleza, S. E.; Cooper, M. M. *Characterizing College Science Assessments: The Three-Dimensional Learning Assessment Protocol*. PLoS ONE 2016, 11, e0162333.]

**Table S3. Transformation of a SR question into CR and SR questions for boiling ranking task**

| Question   | Core Idea                                                                                                   | Science Practice                                                 | Crosscutting Concept                                                |
|------------|-------------------------------------------------------------------------------------------------------------|------------------------------------------------------------------|---------------------------------------------------------------------|
| Original   | Atomic/Molecular Structure and Properties                                                                   | None                                                             | Structure and Function                                              |
| Revised CR | Atomic/Molecular Structure and Properties; Electrostatic and Bonding Interactions; Energy: Atomic/Molecular | Constructing Explanations and Engaging in Argument from Evidence | Structure and Function; Cause and Effect                            |
| Revised SR | Atomic/Molecular Structure and Properties                                                                   | Constructing Explanations and Engaging in Argument from Evidence | Structure and Function; Cause and Effect; Mechanism and Explanation |

## REFERENCES

1. Lavery, J. T.; Underwood, S. M.; Matz, R. L.; Posey, L. A.; Carmel, J. H.; Caballero, M. D.; Fata-Hartley, C. L.; Ebert-May, D.; Jardeleza, S. E.; Cooper, M. M. *Characterizing College Science Assessments: The Three-Dimensional Learning Assessment Protocol*. *PLoS ONE* 2016, 11, e0162333.
